# Supplementary material
Source: publisher site journal article supplement (https://www.dovepress.com/article/256220)
Supplement: Supplementary file 1 [file get_supplementary_file.php]

Figure S1- Representative flowchart of development and implementation of the CAP clinical pathway

| Evidence-based group of healthcare professionals | | | | | | | | | | | | | | | | | | | |
| --- | --- | --- | --- | --- | --- | --- | --- | --- | --- | --- | --- | --- | --- | --- | --- | --- | --- | --- | --- |
|  | | | | | | | | |  | | | | | | | | | | |
|  | Structured PICO questions | | | | → | | Literature search | | | | | → | | Quality assessment of evidence by GRADE system | | | |  | | |
|  | |  |  | | | | | | |  | | | | | |  | | | |
|  | |  | | | | | | | |  | | | | | |  | | | |
| CAP Clinical pathway draft with references | | | | | | | | | | | | | | | | | | | |
| ↓ | | | | | | | | | | | | | | | | | | | |
| Healthcare professionals and local stakeholder’s  Acknowledgement and appraisal | | | | | | | | | | | | | | | | | | | |
| **↓** | | | | | | | | | | | | | | | | | | | |
| Consensus meeting day using Delphi modified method for decision | | | | | | | | | | | | | | | | | | | |
|  | | | | | | | | | |  | | | | | | | | | |
|  | Plenary interactive session | | | | | → | | Objective questions about CAP with the supporting evidence | | | | | → | | Agreement higher than 65% among the audience to arrive to decisions | | |  |
|  |  | | |  | | | | | | |  | | | | | |  | | |
| Final CAP clinical pathway ready for implementation | | | | | | | | | | | | | | | | | | | |

Abbreviations: PICO - patient/population, intervention, comparison and outcomes, GRADE - Grading of Recommendations, Assessment, Development and Evaluation.

Table S1 – Frequency distribution and proportions of patients with low risk CURB-65 admitted to the hospitals from November 2015 to January 2018.

| **Months** | **Discharged (n)** | **Admitted (n)** | **Discharged %** | **Admitted %** |
| --- | --- | --- | --- | --- |
| **First 3** | **1237** | **352** | **77,85** | **22,15** |
| **Cumulative 04-09** | **3371** | **559** | **85,78** | **14,22** |
| 4 | 487 | 82 | 85,59 | 14,41 |
| 5 | 474 | 93 | 83,60 | 16,40 |
| 7 | 619 | 117 | 84,10 | 15,90 |
| 7 | 663 | 90 | 88,05 | 11,95 |
| 8 | 603 | 99 | 85,90 | 14,10 |
| 9 | 525 | 78 | 87,06 | 12,94 |
| **Cumulative 10-15** | **1897** | **307** | **86,07** | **13,93** |
| 10 | 455 | 54 | 89,39 | 10,61 |
| 11 | 448 | 69 | 86,65 | 13,35 |
| 12 | 298 | 60 | 83,24 | 16,76 |
| 13 | 302 | 51 | 85,55 | 14,45 |
| 14 | 265 | 49 | 84,39 | 15,61 |
| 15 | 129 | 24 | 84,31 | 15,69 |
| **Cumulative 16-21** | **848** | **124** | **87,24** | **12,76** |
| 16 | 128 | 24 | 84,21 | 15,79 |
| 17 | 156 | 26 | 85,71 | 14,29 |
| 18 | 156 | 29 | 84,32 | 15,68 |
| 19 | 243 | 22 | 91,70 | 8,30 |
| 20 | 99 | 18 | 84,62 | 15,38 |
| 21 | 66 | 5 | 92,96 | 7,04 |
| **21+** | **268** | **40** | **87,01** | **12,99** |
| **Total** | **7621** | **1382** | **84,66** | **15,34** |

Table S2- Final logistic regression model with indicators of mortality in patients admitted to hospitals with low risk CURB-65

| **Variables** | **OR** | **95%CI** | **p-value** |
| --- | --- | --- | --- |
| **Sex: Male** | 0.83 | 0.39-1.74 | 0,6212 |
| **Headache** | 0.18 | 0.02-1.39 | 0.1 |
| **Sweating** | 1.21 | 0.15-9.51 | 0.8536 |
| **Fevera** | 0.61 | 0.29-1.28 | 0.1913 |
| **New pulmonary**  **Infiltrates** | 3.1 | 1.08-8.89 | 0.0354 |
| **Multilobar infiltrates** | 1.55 | 0.69-3.49 | 0.2906 |
| **Pleural effusion** | 2.11 | 0.86-5.17 | 0.1018 |
| **COPD** | 0.64 | 0.15-2.81 | 0.5541 |
| **Leucopeniab** | 6.37 | 2.14-18.94 | 0.0008 |
| **Antibiotic therapy within 60 min** | 2.06 | 0.88-4.85 | 0.0974 |
| **Hemoculture** | 1.47 | 0.63-3.43 | 0.3756 |
| **LOS > 6 days** | 5.4 | 2.17-13.45 | 0.0002 |

Abbreviations: COPD - chronic obstructive pulmonary disease, LOS – Length of stay

1. Body temperature ≥ 380 c
2. White blood cell count < 4000 cell/mm3

Table S3- Final logistic regression model with predictors of mortality in patients admitted to hospitals with confirmed pneumonia.

| **Variables** | **OR** | **95%CI** | **p-value** |
| --- | --- | --- | --- |
| **Age ≥ 65 years** | 1.82 | 0.97-3.4 | 0.0611 |
| **Sex: Male** | 1.40 | 0.89-2.20 | 0.1418 |
| **Cough** | 0.79 | 0.47-1.37 | 0.3950 |
| **Chest pain** | 0.75 | 0.41- 0.33 | 0.3435 |
| **Confusion** | 1.84 | 1.09-3.07 | 0.0216 |
| **Sweating** | 1.30 | 0.31-4.62 | 0.6987 |
| **Chills** | 0.30 | 0.07-0.88 | 0.0544 |
| **Myalgia** | 0.60 | 0.28-1.17 | 0.1548 |
| **Fevera** | 0.61 | 0.37-0.98 | 0.0440 |
| **Multilobar Infiltrates** | 1.42 | 0.89-2.26 | 0.1358 |
| **Pleural effusion** | 1.76 | 1.01-3.01 | 0.0422 |
| **Urea >50 mg/dl** | 1.73 | 1.06-2.86 | 0.0309 |
| **Hypotension** | 1.79 | 1.00-3.13 | 0.0456 |
| **Respiratory rate > 30 breaths/min** | 2.14 | 1.21-3.72 | 0.0074 |
| **Thrombocytopeniac** | 2.78 | 0.94-7.19 | 0.0458 |
| **Hypotension requiring fluid resuscitation** | 0.97 | 0.49-1.90 | 0.9334 |
| **Hypothermiad** | 0.66 | 0.23-1.66 | 0.4119 |
| **Assignment: ICU** | 2.44 | 1.43-4.23 | 0.0013 |
| **Antibiotic therapy within 60 min** | 0.94 | 0.55-1.65 | 0.8369 |
| **Hemoculture** | 0.77 | 0.46-1.31 | 0.3313 |
| **LOS > 6 days** | 0.83 | 0.50-1.37 | 0.4556 |

Abbreviations: LOS – Length of stay, ICU– Intensive care unit

a-Body temperature ≥ 380 c

b- Systolic blood pressure <90 mm Hg; or diastolic ≤ 60 mmHg

c- Platelet count below 100 000 mm3

Table S4- Accuracy of CURB-65 tool to predict 30-day mortality using each five points of the score as cutoff and comparison of receiver operating characteristic curve for according to the presence of hypoxemia.

| CURB-65 | Sensitivity (95%CI) | Specificity (95%CI) | AUC (95%CI) | p-value |
| --- | --- | --- | --- | --- |
| **Hipoxemia: Yes** |  |  | 72.68 (65.54-79.83) | <0.001 |
| **≥1** | 0.97 (0.88-1.00) | 0.15 (0.11-0.20) |  |  |
| **≥2** | 0.85 (0.73- 0.93) | 0.45 (0.39-0.51) |  |  |
| **≥3** | 0.61 (0.47-0.73) | 0.74 (0.68-0.79) |  |  |
| **≥4** | 0.25 (0.15-0.38) | 0.93 (0.89-0.95) |  |  |
| **5** | 0.10 (0.04-0.21) | 0.99 (0.97-1.00) |  |  |
| **Hipoxemia: No** |  |  | 86.42 (82.97-89.88) |  |
| **≥1** | 0.97 (0.91-0.99) | 0.50 (0.48-0.52) |  |  |
| **≥2** | 0.82 (0.73-0.90) | 0.78 (0.77-0.80) |  |  |
| **≥3** | 0.51 (0.4-0.61) | 0.93 (0.92-0.94) |  |  |
| **≥4** | 0.18 (0.10-0.27) | 0.99 (0.98-0.99) |  |  |
| **5** | 0.01 (0.00-0.06) | 1.00 (1.00-1.00) |  |  |
| **Total** |  |  | 85.74 (82.92-88.57 |  |
| **≥1** | 0.97 (0.92-0.98) | 0.47 (0.45-0.49) |  |  |
| **≥2** | 0.83 (0.76-0.88) | 0.75 (0.73-0.76) |  |  |
| **≥3** | 0.55 (0.46-0.62) | 0.91 (0.90-0.92) |  |  |
| **≥4** | 0.21 (0.14-0.28) | 0.98 (0.97-0.98) |  |  |
| **5** | 0.05 (0.02-0.09) | 1.00 (1.00-1.00) |  |  |

Results are presented in percentage. AUC- Area under receiver operating characteristic curve. CURB-65 is based on confusion, urea level, respiratory rate, blood pressure, and age <65 years. The best method for optimal threshold and AUC comparison was determined by “youden” statistic.

Figure S2- Prognostic performance of CURB-65 assessed by the area under the receiver operating characteristic curve (AUC) in a subgroup of 3425 participants in which data about oxygen saturation was available.


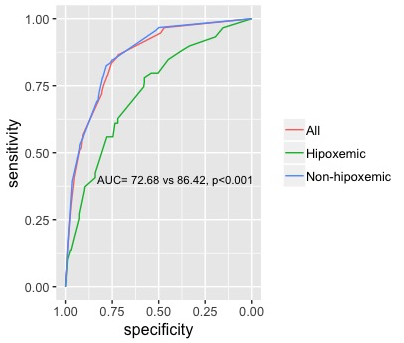


Hypoxemia at admission was defined as present when the oxygen saturation measured by pulse oximetry (SpO2) was less then 90. The AUC for CURB-65 is 72.68(65.54-79.83) for hypoxemic, 86.42(82.97-89.88) for non-hypoxemic and 85.74(82.92-88.57) for all participants admitted and non-admitted, respectively.
